REVIEW PAPER

# The molecular evolution of $\beta$ -carbonic anhydrase in *Flaveria*

Martha Ludwig\*

School of Biomedical, Biomolecular and Chemical Sciences, University of Western Australia, 35 Stirling Highway, Crawley, WA 6009, Australia

\* To whom correspondence should be addressed. E-mail: martha.ludwig@uwa.edu.au

Received 17 November 2010; Accepted 21 February 2011

## Abstract

Limited information exists regarding molecular events that occurred during the evolution of  $C_4$  plants from their  $C_3$  ancestors. The enzyme  $\beta$ -carbonic anhydrase (CA; EC 4.2.1.1), which catalyses the reversible hydration of  $CO_2$ , is present in multiple forms in  $C_3$  and  $C_4$  plants, and has given insights into the molecular evolution of the  $C_4$  pathway in the genus *Flaveria*. cDNAs encoding three distinct isoforms of  $\beta$ -CA, CA1–CA3, have been isolated and examined from *Flaveria*  $C_3$  and  $C_4$  congeners. Sequence data, expression analyses of CA orthologues, and chloroplast import assays with radiolabelled CA precursor proteins from the  $C_3$  species *F. pringlei* Gandoger and the  $C_4$  species *F. bidentis* (L.) Kuntze have shown that both contain chloroplastic and cytosolic forms of the enzyme, and the potential roles of these isoforms are discussed. The data also identified CA3 as the cytosolic isoform important in  $C_4$  photosynthesis and indicate that the  $C_4$  CA3 gene evolved as a result of gene duplication and neofunctionalization, which involved mutations in coding and non-coding regions of the ancestral  $C_3$  CA3 gene. Comparisons of the deduced CA3 amino acid sequences from *Flaveria*  $C_3$ ,  $C_4$ , and photosynthetic intermediate species showed that all the  $C_3$ – $C_4$  intermediates investigated and *F. brownii*, a  $C_4$ -like species, have a  $C_3$ -type CA3, while *F. vaginata*, another  $C_4$ -like species, contains a  $C_4$ -type CA3. These observations correlate with the photosynthetic physiologies of the intermediates, suggesting that the molecular evolution of  $C_4$  photosynthesis in *Flaveria* may have resulted from a temporally dependent, stepwise modification of protein-encoding genes and their regulatory elements.

**Key words:**  $C_4$  photosynthesis, carbonic anhydrase, *Flaveria*, molecular evolution, photosynthetic intermediate.

## Introduction

Plants using the  $C_4$  photosynthetic pathway have evolved from  $C_3$  ancestors in multiple angiosperm lineages, with falling  $CO_2$  concentrations in the atmosphere during the Oligocene likely to be the primary driver for the evolution of the syndrome (Sage, 2004; see other contributions to this volume). Further expansion of the  $C_4$  condition during the Miocene and Pleistocene occurred due to changes in other environmental factors that promote photorespiration in  $C_3$  plants such as heat, aridity, and soil salinity (Sage, 2004; Osborne and Beerling, 2006; Tipple and Pagani, 2007; Christin *et al.*, 2008; Vicentini *et al.*, 2008; Osborne and Freckleton, 2009; Edwards and Smith, 2010; Edwards *et al.*, 2010). These atmospheric and climatic pressures led to the evolution of a combination of anatomical and biochemical traits that enable  $C_4$  plants to concentrate  $CO_2$  around ribulose-1,5-bisphosphate carboxylase/oxygenase

(Rubisco), almost eliminating photorespiration. As a consequence,  $C_4$  plants outcompete  $C_3$  species in hot, high light, dry, and saline environments—environments that are expanding in some regions of the world due to global climate change.

While the remarkable similarities in the structural and biochemical characteristics of  $C_4$  plants of different ancestry have been recognized for years, relatively little is known about the molecular mechanisms underlying the evolution of the  $C_4$  pathway. Determining how the genes controlling the advantageous survival traits of  $C_4$  species evolved—that is identification of gene duplication events and modifications leading to neofunctionalization—and how the enzymatic steps came together to give a functional  $C_4$  plant will expand our understanding of what molecular mechanisms were used and required in the evolution of  $C_4$  pathways,

and this will contribute to targeted strategies for transferring these traits to  $C_3$  crop plants.

### ***Flaveria*: a model genus to study the molecular evolution of $C_4$ photosynthesis**

*Flaveria* is one of several plant genera that contain individual species that perform  $C_3$  photosynthesis, others that use the  $C_4$  pathway, and still others that carry out  $C_3$ – $C_4$  or  $C_4$ -like intermediate types of photosynthesis (Powell, 1978). *Flaveria* photosynthetic intermediates demonstrate differing leaf anatomies, biochemistries, and photosynthetic physiologies that appear to form a continuum from the  $C_3$  ancestral condition to the more highly derived  $C_4$  state (Powell, 1978; Edwards and Ku, 1987; McKown *et al.*, 2005; McKown and Dengler, 2007). Phylogenetic information indicates that  $C_4$  photosynthesis may have evolved at least three times in the genus (McKown *et al.*, 2005). This diversity of photosynthesis amongst a group of closely related plants greatly assists molecular evolutionary studies; for example, orthologous and paralogous genes are typically easily recognized, which facilitates the identification of differences (mutations) in coding and/or regulatory regions. Not surprisingly, a number of research groups have taken advantage of this collection of plants to study the molecular evolution of  $C_4$  photosynthetic enzymes (Hermans and Westhoff, 1990; Rajeevan *et al.*, 1991; Lipka *et al.*, 1994; Rosche *et al.*, 1994; Ludwig and Burnell, 1995; McGonigle and Nelson, 1995; Marshall *et al.*, 1996; Drincovich *et al.*, 1998; Lai *et al.*, 2002). The work from these groups has shown that the genes encoding enzyme isoforms important in *Flaveria*  $C_4$  photosynthesis evolved from the duplication of an ancestral  $C_3$  gene and/or the acquisition of regulatory sequences that led to increased levels of cell-dependent expression (Marshall *et al.*, 1997; Rosche *et al.*, 1998; Ali and Taylor, 2001; Lai *et al.*, 2002; Gowik *et al.*, 2004; Engelmann *et al.*, 2008).

### **Carbonic anhydrases (CAs) in $C_3$ and $C_4$ plants**

CAs (EC 4.2.1.1) of land plants are zinc metalloenzymes that catalyse the reversible hydration of  $CO_2$ . Three classes of CA,  $\alpha$ ,  $\beta$ , and  $\gamma$ , have been identified in land plants (Hewett-Emmett and Tashian, 1996; Moroney *et al.*, 2001; Ivanov *et al.*, 2007) and, while no conservation of amino acid sequence or higher orders of structure is seen between enzymes from the different classes, all catalyse the interconversion of  $CO_2$  and bicarbonate.

Currently little information exists regarding  $\gamma$ - and  $\alpha$ -CA isoforms in flowering plants. Higher plant  $\gamma$ -CA isoforms are part of the mitochondrial complex I (Parisi *et al.*, 2004), and involvement in complex I assembly has been shown for one *Arabidopsis*  $\gamma$ -CA isoform using knockout mutants (Perales *et al.*, 2005). No CA activity has been detected

biochemically for these proteins, although they have been shown to bind inorganic carbon (Martin *et al.*, 2009). Eight  $\alpha$ -CA genes have been identified in *Arabidopsis*; however, Fabre *et al.* (2007) detected transcripts from only *At $\alpha$ CA1*, *At $\alpha$ CA2*, and *At $\alpha$ CA3*, and suggested that the transcripts from the other genes may be unstable, or their expression may be low, induced under particular conditions, or in specific cell types. *At $\alpha$ CA1* mRNA was found in all above-ground organs tested (Fabre *et al.*, 2007) and this CA is transported to the chloroplast through the secretory pathway (Villarejo *et al.*, 2005). *At $\alpha$ CA2* transcripts, found in stems and roots, and *At $\alpha$ CA3* mRNA, detected in flowers and siliques, increased in abundance when plants were grown in a low  $CO_2$  environment (Fabre *et al.*, 2007). Although roles for  $\gamma$ - and  $\alpha$ -CA isoforms in photosynthesis cannot be ruled out, currently there is no clear support for these proteins being involved in either the  $C_3$  or the  $C_4$  pathway.

Multiple forms of  $\beta$ -CAs have been found in all investigated angiosperms (Burnell, 2000; Coleman, 2000; Moroney *et al.*, 2001; Ivanov *et al.*, 2007). In  $C_3$  plants, most CA activity localizes to the chloroplast stroma of the mesophyll cells (Poincelot, 1972; Jacobson *et al.*, 1975; Tsuzuki *et al.*, 1985) where it has been proposed to facilitate the diffusion of  $CO_2$  across the chloroplast envelope or catalyse the rapid dehydration of bicarbonate to  $CO_2$ , ensuring adequate concentrations of  $CO_2$  for Rubisco and carbohydrate production (Reed and Graham, 1981; Cowan, 1986; Price *et al.*, 1994). However, this role is somewhat controversial as no significant impairment in  $CO_2$  assimilation was detected in mature leaves of  $\beta$ -CA antisense tobacco plants containing <1% of wild-type CA levels (Majeau *et al.*, 1994; Price *et al.*, 1994; Williams *et al.*, 1996) or *Arabidopsis* chloroplastic  $\beta$ -CA gene knockout lines (Ferreira *et al.*, 2008). Recently,  $C_3$  plastidial  $\beta$ -CAs have been shown to play a role in stomatal closure (Hu *et al.*, 2010), and to have non-photosynthetic functions, including lipid synthesis (Hoang and Chapman, 2002) and disease resistance (Slaymaker *et al.*, 2002; Restrepo *et al.*, 2005; Wang *et al.*, 2009).

Whereas solid evidence for chloroplastic  $\beta$ -CA playing a role in  $C_3$  photosynthesis remains elusive, the function of  $\beta$ -CA in the  $C_4$  photosynthetic pathway is unequivocal. The greatest CA activity in  $C_4$  plants also localizes to leaf mesophyll cells; however, the enzyme is active in the cytosol of these cells (Gutierrez *et al.*, 1974; Ku and Edwards, 1975; Burnell and Hatch, 1988). In the  $C_4$  mesophyll, CA catalyses the first reaction in the  $C_4$  photosynthetic pathway (Hatch and Burnell, 1990)—the hydration of atmospheric  $CO_2$ —producing bicarbonate for phosphoenolpyruvate carboxylase (PEPC), the primary carboxylase of  $C_4$  plants.

Chloroplastic forms of  $\beta$ -CA are also found in the leaves of  $C_4$  plants (Tetu *et al.*, 2007), and  $C_3$  plants contain cytosolic forms of the enzyme (Kachru and Anderson, 1974; Reed, 1979; Fett and Coleman, 1994; Rumeau *et al.*, 1996; Fabre *et al.*, 2007; Tanz *et al.*, 2009). Chloroplastic  $\beta$ -CA isoforms in  $C_4$  plants are likely to carry out at least some of the same functions as those described above for  $C_3$  plant plastidial

$\beta$ -CAs, although ensuring adequate concentrations of CO<sub>2</sub> are available for Rubisco and carbohydrate production is not likely to be a primary role in C<sub>4</sub> species due to their biochemical CO<sub>2</sub>-concentrating mechanism (CCM). Non-photosynthetic, cytosolic forms of  $\beta$ -CA are thought to provide non-photosynthetic PEPC isoforms with bicarbonate for anaplerotic roles such as replenishment of tricarboxylic acid intermediates, amino acid synthesis, and maintenance of cellular pH (Fett and Coleman, 1994; Raven and Newman, 1994).

### $\beta$ -CA isoforms in *Flaveria*

Most of what is currently known about the molecular evolution of plant  $\beta$ -CAs has come from work using *F. pringlei* Gandoger, a C<sub>3</sub> species (Tanz *et al.*, 2009), and the C<sub>4</sub> species *F. bidentis* (L.) Kuntze (Tetu *et al.*, 2007). cDNAs encoding three distinct  $\beta$ -CA isoforms have been isolated from leaf tissues of these species, and the orthologous genes encoding CA1, CA2, and CA3 have been identified through sequence analyses. Greater than 90% amino acid sequence identity is seen between the isoforms encoded by orthologues (Ludwig and Burnell, 1995; Tetu *et al.*, 2007; Tanz *et al.*, 2009), and amino acid residues involved in substrate binding and catalysis in pea (Provant *et al.*, 1993; Kimber and Pai, 2000) and spinach (Bracey *et al.*, 1994)  $\beta$ -CAs are highly conserved in all *Flaveria* CA sequences published to date (Cavallaro *et al.*, 1994; Ludwig and Burnell, 1995; Tetu *et al.*, 2007; Tanz *et al.*, 2009).

The location of CA in the leaves of *F. pringlei* and *F. bidentis* was resolved using immunocytochemistry with an anti-*F. bidentis* CA3 antiserum. Labelling was detected in the chloroplasts and in the cytosol of leaf mesophyll cells from both *F. pringlei* (Tanz *et al.*, 2009) and *F. bidentis* (Tetu *et al.*, 2007). Chloroplast import assays, using isolated pea chloroplasts and radiolabelled CA precursor proteins, were used to determine which *F. pringlei* and *F. bidentis*  $\beta$ -CAs were chloroplastic enzymes. The results of these assays demonstrated that for *F. pringlei*, two CA isoforms, CA1 and CA3, were imported into isolated pea chloroplasts with a concomitant decrease in the molecular masses of the CA1 and CA3 precursor molecules, indicating processing to the mature forms of the enzymes through removal of chloroplast transit peptides during import. In contrast, *F. pringlei* CA2 was not imported into isolated pea chloroplasts and is presumably a cytosolic form of the enzyme in this C<sub>3</sub> species (Tanz *et al.*, 2009). When *F. bidentis* CA precursor proteins were used in the assays, only CA1 was imported into the pea chloroplasts, indicating that this C<sub>4</sub> species contains two cytosolic forms of CA, CA2 and CA3 (Tetu *et al.*, 2007). All these localization results are supported by protein targeting prediction programs, which predict that the N-terminal ends of *F. pringlei* CA1 and CA3 and *F. bidentis* CA1 encode chloroplast transit peptides, but the N-termini of *F. pringlei* CA2 and *F. bidentis* CA2 and CA3 encode no organelle targeting information (Tetu *et al.*, 2007; Tanz *et al.*, 2009).

The CA1–CA3 genes from *F. pringlei* and *F. bidentis* show differential expression in leaves, roots, and flowers. In *F. pringlei* leaves, quantitative real-time reverse transcription-polymerase chain reaction (qRT-PCR) assays showed that CA1 and CA3 gene transcripts are of equal abundance, and at least 10 times more abundant than CA2 mRNA (Fig. 1; Tanz *et al.*, 2009). In the leaves of the C<sub>4</sub> *F. bidentis*, CA3 mRNA levels are at least 50 times greater than those of CA1 and CA2 transcripts (Fig. 1; Tetu *et al.*, 2007). On a leaf total RNA basis, *F. bidentis* CA3 gene transcript levels are about a magnitude greater than those of the *F. pringlei* CA3 gene (Fig. 1). In roots and flowers of *F. pringlei*, CA2 mRNAs are the most abundant CA gene transcript, with CA3 transcripts below the level of detection in these non-photosynthetic organs, and CA1 mRNA just detectable in flowers but not in *F. pringlei* roots (Table 1; Tanz *et al.*, 2009). *Flaveria bidentis* CA2 transcript levels are also higher than those of CA1 and CA3 mRNAs in roots; however, in *F. bidentis* flowers, CA2 and CA3 transcript levels are nearly equal, most probably reflecting the presence of photosynthetic tissues surrounding the still maturing florets in the composite flower of this species (Table 1; Tetu *et al.*, 2007).

### Potential roles of CA1 and CA2 in *Flaveria* C<sub>3</sub> and C<sub>4</sub> species

Table 1 summarizes the CA isoform localization and gene expression patterns described above, which indicate that CA1 is a chloroplastic form of the enzyme that is expressed in the leaves of both C<sub>3</sub> and C<sub>4</sub> *Flaveria* species. In the mesophyll cells of *F. pringlei* and in the bundle-sheath cells

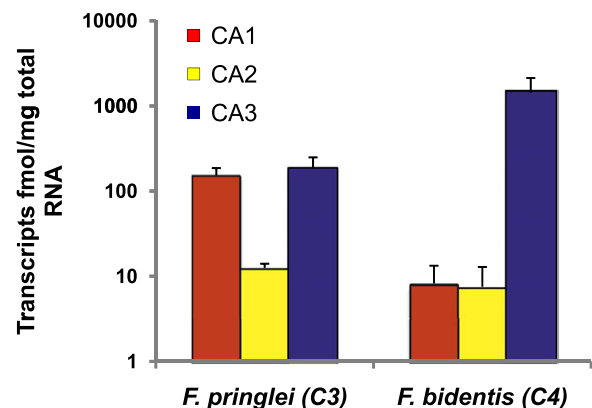

**Fig. 1.** CA1, CA2, and CA3 gene transcript abundance in leaves of *Flaveria pringlei* and *Flaveria bidentis*. Transcript levels were determined using quantitative reverse transcription PCR assays and *F. pringlei* or *F. bidentis* CA1–CA3 gene-specific primers, and are based on the total amount of RNA used in the assays. Error bars represent the SE of at least three independent reactions for *F. pringlei* and the SD of two independent replicates for *F. bidentis*. Data were originally reported in Tetu *et al.* (2007) and Tanz *et al.* (2009). www.plantphysiol.org, Copyright American Society of Plant Biologists.



of *F. bidentis*, CA1 isoforms are likely to be responsible for one or more of the functions described above for plastidial  $\beta$ -CAs (Fig. 2). As these results were collected from *in vitro* import assays and whole leaf mRNA, the possibility that CA1 may also carry out the non-photosynthetic roles of plastidial  $\beta$ -CAs in the chloroplasts of *F. bidentis* mesophyll cells, and/or regulate stomatal movement (Hu *et al.*, 2010) in *F. pringlei* and *F. bidentis* guard cells cannot be ruled out.

*Flaveria bidentis* and *F. pringlei* CA2 gene transcripts, which encode cytosolic forms of  $\beta$ -CA, are of relatively low abundance in both photosynthetic and non-green tissues, suggesting that this CA isoform may be responsible for supplying bicarbonate to housekeeping forms of PEPC in both photosynthetic subtypes (Fig. 2). Interestingly, when the deduced amino acid sequences of the *F. pringlei* and *F. bidentis* CA2 isoforms are compared with those of the six *Arabidopsis*  $\beta$ -CAs (Fabre *et al.*, 2007), the highest identity

is seen with *At* $\beta$ CA4 (Tanz *et al.*, 2009), which localizes to *Arabidopsis* (Fabre *et al.*, 2007) and tobacco (Hu *et al.*, 2010) cell plasma membranes, and along with *At* $\beta$ CA1 has recently been shown to be involved in stomatal movement (Hu *et al.*, 2010). A number of associations between cytosolic  $\beta$ -CAs and plant plasma membranes have been documented (Utsunomiya and Muto, 1993; Santoni *et al.*, 1998; Kawamura and Uemura, 2003; Alexandersson *et al.*, 2004; Mongrand *et al.*, 2004; Benschop *et al.*, 2007; Mitra *et al.*, 2007; Tang *et al.*, 2008), and in one of these (Mongrand *et al.*, 2004), the  $\beta$ -CA was also found closely associated with a plasma membrane-located aquaporin shown to have CO<sub>2</sub> transport activity (Uehlein *et al.*, 2003). The current localization and expression data for CA2 in C<sub>3</sub> and C<sub>4</sub> *Flaveria* congeners certainly leave open the possibility that this cytosolic CA isoform may play a role in cellular CO<sub>2</sub> conductance and/or diffusion. The possibility that CA2

**Table 1.** Carbonic anhydrase isoform location and gene expression patterns in *Flaveria pringlei* and *Flaveria bidentis*

|                                      | CA isoform location <sup>a</sup> |          | Relative CA transcript abundance <sup>b</sup> |             |             |
|--------------------------------------|----------------------------------|----------|-----------------------------------------------|-------------|-------------|
|                                      | Chloroplast                      | Cytosol  | Leaves                                        | Roots       | Flowers     |
| <i>F. pringlei</i> (C <sub>3</sub> ) | CA1; CA3                         | CA2      | CA1=CA3>>CA2                                  | CA2         | CA2>>CA1    |
| <i>F. bidentis</i> (C <sub>4</sub> ) | CA1                              | CA2; CA3 | CA3>>>CA1=CA2                                 | CA2>CA3>CA1 | CA2=CA3>CA1 |

<sup>a</sup> Localization results are based on *in vitro* chloroplast import assays (Tetu *et al.*, 2007; Tanz *et al.*, 2009).

<sup>b</sup> Relative transcript abundance data are from qRT-PCR assays (Tetu *et al.*, 2007; Tanz *et al.*, 2009).

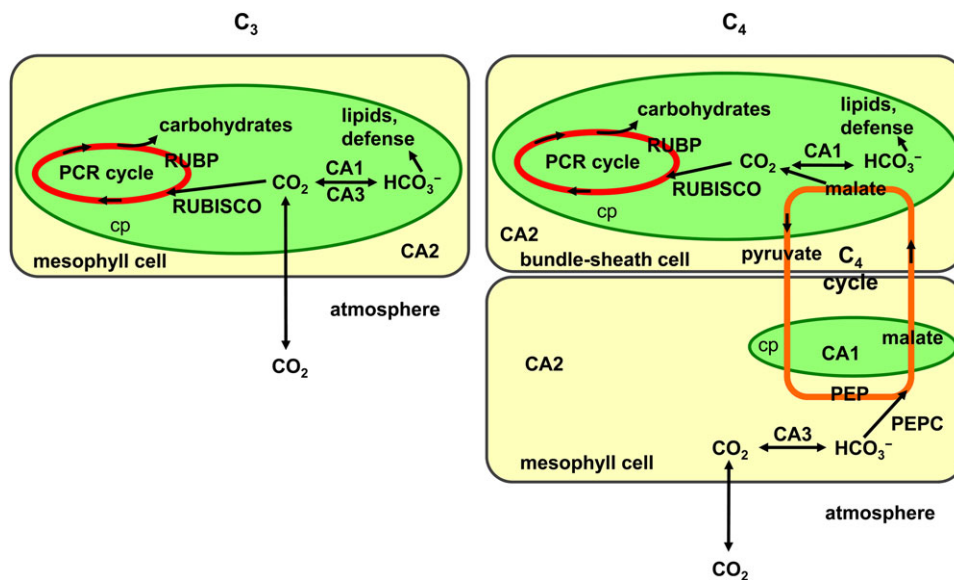

**Fig. 2.** Schematic diagram of the C<sub>3</sub> and C<sub>4</sub> photosynthetic pathways and the locations of carbonic anhydrase (CA) isoforms. In C<sub>3</sub> plants most CA activity localizes to the chloroplasts (cp) of the mesophyll cells where it plays a role in lipid biosynthesis, defence, and potentially in ensuring adequate concentrations of CO<sub>2</sub> are available for carbohydrate production via ribulose-1,5-bisphosphate carboxylase/oxygenase (Rubisco) and the other enzymes of the photosynthetic carbon reduction (PCR) cycle. In C<sub>3</sub> *Flaveria* species, CA1 and CA3 are chloroplastic enzymes, while CA2 is cytosolic. In the leaves of C<sub>4</sub> plants, most CA activity is found in the cytosol of the mesophyll cells where it catalyses the conversion of atmospheric CO<sub>2</sub> to bicarbonate, which is then used to carboxylate phosphoenolpyruvate (PEP) by PEP carboxylase (PEPC), producing a four-carbon compound, such as malate, that then diffuses into the bundle-sheath cell where it is decarboxylated. In C<sub>4</sub> *Flaveria* species, decarboxylation occurs in the bundle-sheath chloroplasts through NADP-malic enzyme activity. The released CO<sub>2</sub> is fixed by Rubisco and the pyruvate is used to regenerate PEP. In C<sub>4</sub> *Flaveria* species, CA1 localizes to the chloroplast while CA2 and CA3 are cytosolic, with the latter catalysing the first step in the C<sub>4</sub> pathway. RUBP, ribulose-1,5-bisphosphate.

may contribute bicarbonate to the *F. bidentis* C<sub>4</sub> pathway cannot be dismissed; however, the low steady-state transcript levels of this CA isoform compared with those of CA3 in *F. bidentis* leaves argue against a major role for CA2 in the pathway.

As indicated above, it is likely that in C<sub>4</sub> *Flaveria* species, the ancestral C<sub>3</sub> roles of the CA1 and CA2 isoforms have been maintained; however, the functions of these isoforms in *Flaveria* species, as well as those of their homologues in other C<sub>3</sub> and C<sub>4</sub> plants, still await clarification. Resolution of the cell type-specific expression patterns of these isoforms and identification of the proteins interacting with each in C<sub>3</sub> and C<sub>4</sub> species will fill some of these gaps, and will result in a more complete picture of the physiological processes involving β-CAs in C<sub>3</sub> and C<sub>4</sub> plants, and the molecular evolution of the C<sub>4</sub> pathway in *Flaveria*.

### Flaveria CA3: how a chloroplastic C<sub>3</sub> CA became the cytosolic isoform necessary for the C<sub>4</sub> biochemical CCM

Unlike CA1 and CA2 from the *Flaveria* congeners, the CA3 isoforms from *F. pringlei* and *F. bidentis* show striking differences with respect to their cellular locations and the

expression patterns of their cognate genes (Table 1). The high levels of CA3 transcripts in *F. bidentis* leaves relative to other *F. bidentis* organs and relative to the levels of *F. pringlei* CA3 transcripts (Fig 1; Table 1), and the demonstration that this isoform is not imported into isolated pea chloroplasts (Tetu *et al.*, 2007) but *F. pringlei* CA3 is (Tanz *et al.*, 2009) strongly argue that this is the enzyme catalysing the formation of bicarbonate for PEPC in the *F. bidentis* mesophyll cytosol. This premise is further supported by results of experiments in which an antisense construct targeted against *F. bidentis* CA3 was used to transform wild-type *F. bidentis* plants. It was shown that although CA activity is not limiting for CO<sub>2</sub> assimilation in wild-type plants, high activity is required in the C<sub>4</sub> mesophyll cytosol for the C<sub>4</sub> pathway to function as a biochemical CCM (von Caemmerer *et al.*, 2004).

When the deduced amino acid sequences of the *F. pringlei* and *F. bidentis* CA3 isoforms are compared, 93% identity is seen over the shared regions when the initiating methionine of *F. bidentis* CA3 is aligned with the second methionine of the *F. pringlei* isoform (Met72; Fig. 3). The N-terminal 71 amino acids of *F. pringlei* CA3 encode a chloroplast transit sequence with the characteristically high proportion of serine and threonine residues and a low number of charged amino acids (von Heijne *et al.*, 1989).

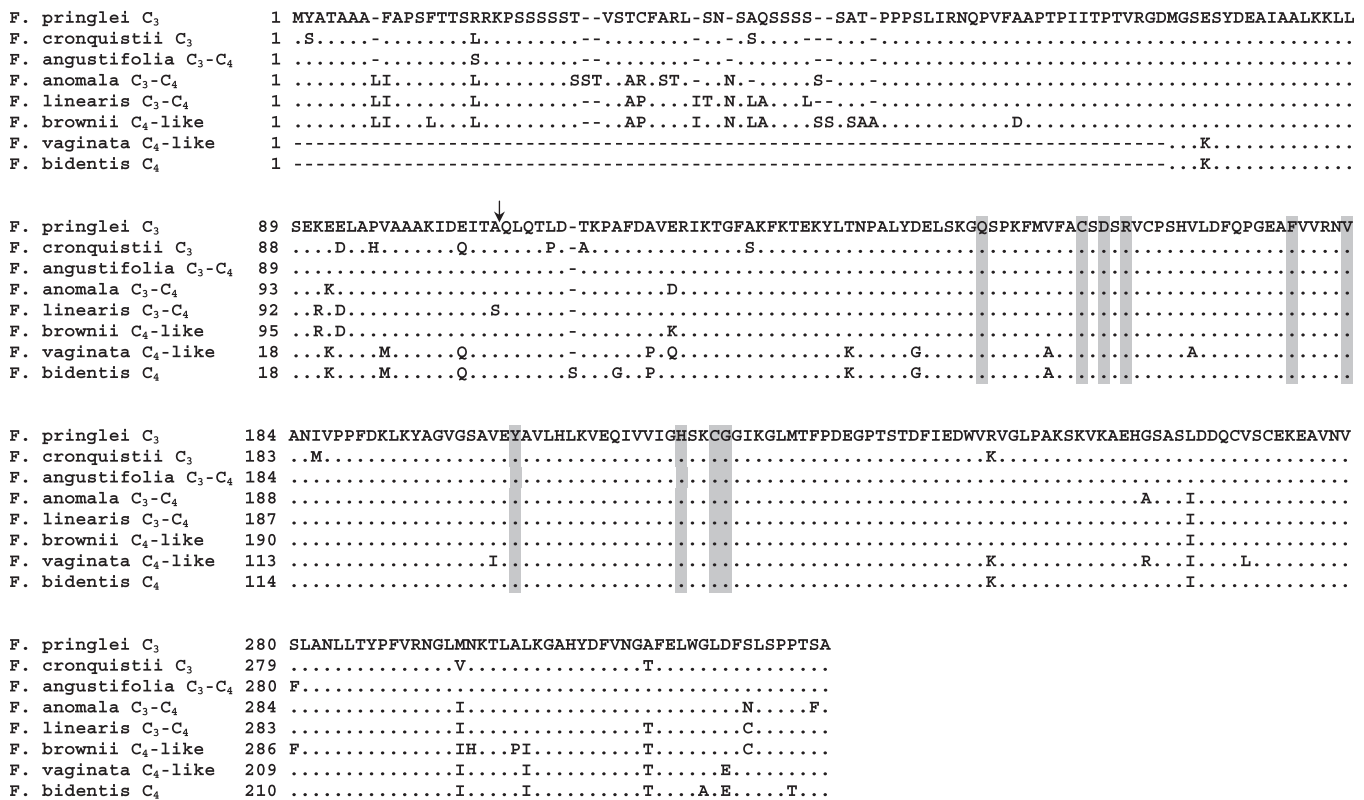

**Fig. 3.** Alignment of the deduced amino acid sequences of CA3 isoforms from selected *Flaveria* species. Identical residues are depicted as dots, while gaps inserted to maximize the alignment are represented by dashes. The predicted cleavage site of plastidial C<sub>3</sub> dicot β-CAs is indicated by the arrow (Burnell *et al.*, 1990; Roeske and Ogren, 1990). Residues involved in Zn<sup>2+</sup> binding and the active site of pea CA are shaded grey (Provar *et al.*, 1993; 1994; Kimber and Pai, 2000). GenBank accession numbers: *F. pringlei* CA3, DQ273587; *F. cronquistii* CA3, JF313387; *F. angustifolia* CA3, JF313384; *F. anomala* CA3, JF313385; *F. linearis* CA3, DQ273588; *F. brownii* CA3, JF313386; *F. vaginata* CA3, JF313388; *F. bidentis* CA3, AY16711.

Altogether, the results of the localization, expression, transgenic, and sequence analyses indicate that the C<sub>3</sub> CA3 gene was the evolutionary template for the cytosolic C<sub>4</sub> form of the enzyme. During the evolution of the C<sub>4</sub> pathway in *Flaveria*, mutation(s) occurred in the sequence encoding the chloroplast transit peptide of the ancestral C<sub>3</sub> CA3 gene, which prevented the import of the isoform into the chloroplasts of C<sub>4</sub> species, and instead allowed the hydration of atmospheric CO<sub>2</sub> to bicarbonate in the mesophyll cytosol (Fig. 2).

Changes in the control regions of the ancestral C<sub>3</sub> CA3 gene must also have occurred to account for the mesophyll-dependent, high level of CA3 expression in present-day C<sub>4</sub> *Flaveria* species. Sequence analysis of the region 2 kb upstream of the *F. bidentis* CA3 translation initiation site identified a sequence similar to that of the *Mesophyll expression module 1* (*Mem1*; SK Tanz and M Ludwig, unpublished results), which directs mesophyll-specific expression of *ppcA*, the C<sub>4</sub> PEPC gene in *Flaveria* (Gowik *et al.*, 2004), and, in combination with a proximal promoter region, regulates high levels of PEPC expression in the C<sub>4</sub> mesophyll (Engelmann *et al.*, 2008). No *Mem1*-like sequence was found in the 4 kb region upstream of the *F. pringlei* CA3 translation initiation site (SK Tanz and M Ludwig, unpublished results). Preliminary work has indicated that the 2 kb upstream region of the *F. bidentis* CA3 gene directs mesophyll-specific expression of a  $\beta$ -glucuronidase (GUS)-reporter construct (U Gowik, P Westhoff, and M Ludwig, unpublished results). The possibility that the expression of the *Flaveria ppcA* and CA3 genes, which encode the enzymes that catalyse the first two steps in the C<sub>4</sub> pathway, resulted from the co-option of a similar regulatory strategy and control elements during evolution is intriguing, and identification of specific regulatory elements within the 2 kb *F. bidentis* CA3 upstream region is underway.

Although the role of CA3 in C<sub>4</sub> *Flaveria* species is unambiguous, this is not the case for the CA3 isoform in *F. pringlei*. As described above, diverse roles have been proposed and shown for plastidial  $\beta$ -CAs. As *F. pringlei* CA3 transcripts were detected in only the photosynthetic tissues examined by Tanz *et al.* (2009), this isoform may function in CO<sub>2</sub> diffusion to Rubisco in C<sub>3</sub> *Flaveria* chloroplasts (Reed and Graham, 1981; Cowan, 1986; Price *et al.*, 1994). This role would have been expendable in an evolving C<sub>4</sub> system because of the developing biochemical CCM, presenting the opportunity for neofunctionalization of the CA3 gene in C<sub>4</sub> lineages. Non-photosynthetic roles described above for C<sub>3</sub> plastidial  $\beta$ -CAs, such as lipid synthesis and defence, which are also necessary in C<sub>4</sub> species, would be catalysed by the chloroplastic CA1 isoform.

### Chloroplastic and cytosolic CA isoforms in *Flaveria* photosynthetic intermediates

Sequence information and protein targeting prediction data accumulated thus far for CA1 and CA2 isoforms from the

C<sub>3</sub>–C<sub>4</sub> intermediates *F. angustifolia* (Cav.) Persoon, *F. anomala* B.L. Robinson, and *F. linearis* Lagasca, the C<sub>4</sub>-like species *F. brownii* A.M. Powell and *F. vaginata* B.L. Robinson & Greenman, and another C<sub>3</sub> species, *F. cronquistii* A.M. Powell, indicate that these proteins are chloroplastic and cytosolic isoforms, respectively, in all these species (ML, unpublished results).

Complete open reading frames encoding CA3 isoforms have been isolated from rapid amplification of cDNA ends (RACE) libraries made from leaf mRNA of the above intermediates and *F. cronquistii*, using primers that bind to highly conserved regions of *F. pringlei* and *F. bidentis* CA3 cDNAs. Like the CA3 isoforms from *F. pringlei* and *F. bidentis*, the predicted protein sequences of these recently acquired CA3 cDNAs show high identity (at least 88%) and contain all the amino acid residues required for zinc binding and  $\beta$ -CA active site formation (Fig. 3; Provart *et al.*, 1993; Bracey *et al.*, 1994; Kimber and Pai, 2000).

The N-termini of the CA3 isoforms from the C<sub>3</sub> *F. cronquistii* and all the photosynthetic intermediates except *F. vaginata* contain a high number of hydroxylated amino acids and few charged residues, and all are predicted by the protein targeting prediction program Predotar (Small *et al.*, 2004) to encode chloroplast transit peptides (data not shown). In contrast, the N-terminus of the deduced *F. vaginata* CA3 amino acid sequence aligns with the initiating methionine of the *F. bidentis* CA3 isoform, the CA supplying PEPC with bicarbonate in the cytosol of C<sub>4</sub> mesophyll cells.

Mapping the type of CA3 found in the C<sub>3</sub>, C<sub>3</sub>–C<sub>4</sub>, C<sub>4</sub>-like, and C<sub>4</sub> *Flaveria* species so far examined onto the *Flaveria* phylogeny re-constructed by McKown *et al.* (2005) shows that the cytosolic (C<sub>4</sub>) and chloroplastic (C<sub>3</sub>) CA3 isoforms cluster in different clades (Fig 4). The C<sub>3</sub> isoforms are found in the basal C<sub>3</sub> species and in species clustering in clade B, which, with the exception of *F. brownii*, contains only C<sub>3</sub>–C<sub>4</sub> intermediate species. In contrast, the C<sub>4</sub> isoforms are found in species in clade A, which contains C<sub>3</sub>–C<sub>4</sub>, C<sub>4</sub>-like, and true C<sub>4</sub> *Flaveria* species (Fig. 4). Of particular interest is the finding that *F. brownii* and *F. vaginata*, which are both recognized as C<sub>4</sub>-like intermediates (Table 2; Smith and Powell, 1984; Monson *et al.*, 1986; Moore *et al.*, 1987, 1989; Cheng *et al.*, 1988; Chastain and Chollet 1989; Ku *et al.*, 1991; McKown and Dengler 2007), contain forms of CA3 that are structurally characteristic of C<sub>3</sub> and C<sub>4</sub> *Flaveria* species, respectively, and consequently, localize to different intracellular compartments and perform different biochemical roles.

### *Flaveria brownii* and *F. vaginata*: C<sub>4</sub>-like intermediates at different steps on the pyramid of C<sub>4</sub> photosynthesis

Both *F. brownii* and *F. vaginata* demonstrate Kranz leaf anatomy, and few quantitative differences are detected between their leaves and those of true C<sub>4</sub> *Flaveria* species, although the numbers of mesophyll chloroplasts and cell

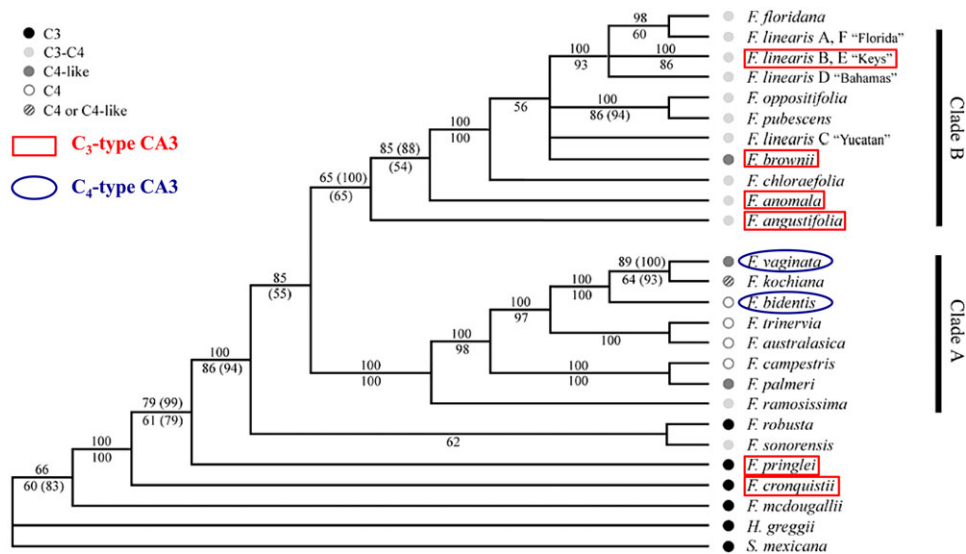

**Fig. 4.** The distribution of CA3 isoform types in *Flaveria*. C<sub>3</sub>-type CA3 isoforms (red boxes) are found in the ancestral C<sub>3</sub> *Flaveria* species, the C<sub>3</sub>–C<sub>4</sub> intermediates in Clade B examined so far, and *F. brownii*, a C<sub>4</sub>-like *Flaveria* species also in Clade B. C<sub>4</sub>-type CA3 isoforms (blue circles) are found in the C<sub>4</sub> species *F. bidentis* and *F. vaginata*, a C<sub>4</sub>-like species, both in Clade A. Diagram modified from McKown *et al.* (2005) used by permission of the *American Journal of Botany*.

**Table 2.** Phylogenetic clustering, type of CA3 isoform, and gas exchange properties of selected C<sub>3</sub>, C<sub>4</sub>, and photosynthetic intermediate species of *Flaveria*

| Species                                                  | Clade <sup>a</sup> | CA3 type       | CO <sub>2</sub> assimilation rate <sup>b</sup><br>(μmol m <sup>-2</sup> s <sup>-1</sup> ) | CO <sub>2</sub> compensation point <sup>b</sup><br>(μbar) | O <sub>2</sub> inhibition of CO <sub>2</sub><br>assimilation <sup>b</sup> (%) | δ <sup>13</sup> C <sup>c</sup> (‰) |
|----------------------------------------------------------|--------------------|----------------|-------------------------------------------------------------------------------------------|-----------------------------------------------------------|-------------------------------------------------------------------------------|------------------------------------|
| <i>F. cronquistii</i> (C <sub>3</sub> )                  | Basal              | C <sub>3</sub> | 16.8±0.9                                                                                  | 60.4±1.7                                                  | 30.2±0.7                                                                      | -23.0                              |
| <i>F. pringlei</i> (C <sub>3</sub> )                     | Basal              | C <sub>3</sub> | 20.9±0.8                                                                                  | 62.0±0.3                                                  | 32.2±1.0                                                                      | -26.5                              |
| <i>F. angustifolia</i> (C <sub>3</sub> –C <sub>4</sub> ) | B                  | C <sub>3</sub> | 24.4±0.3                                                                                  | 24.1±0.4                                                  | 26.8±0.2                                                                      | -26.8                              |
| <i>F. anomala</i> (C <sub>3</sub> –C <sub>4</sub> )      | B                  | C <sub>3</sub> | 13.9±0.3                                                                                  | 15.5±0.7                                                  | 22.4±1.7                                                                      | -28.5                              |
| <i>F. linearis</i> (C <sub>3</sub> –C <sub>4</sub> )     | B                  | C <sub>3</sub> | 17.0±1.7                                                                                  | 27.0±1.7                                                  | 25.9±0.9                                                                      | -27.4                              |
| <i>F. brownii</i> (C <sub>4</sub> -like)                 | B                  | C <sub>3</sub> | 25.2±0.6                                                                                  | 6.0±1.3                                                   | 11.4±0.5                                                                      | -17.3                              |
| <i>F. vaginata</i> (C <sub>4</sub> -like)                | A                  | C <sub>4</sub> | 27.2±2.1                                                                                  | 3.0±1.2                                                   | 7.1±0.3                                                                       | -15.3                              |
| <i>F. bidentis</i> (C <sub>4</sub> )                     | A                  | C <sub>4</sub> | 32.4±0.5                                                                                  | 3.2±0.3                                                   | -1.2±0.4                                                                      | -16.5                              |

<sup>a</sup> Data from McKown *et al.* (2005).

<sup>b</sup> Data from Ku *et al.* (1991).

<sup>c</sup> Data from Smith and Powell (1984).

layers are greater in *F. brownii* (McKown and Dengler, 2007). As well as having a C<sub>4</sub>-type CA3, *F. vaginata* has a characteristic C<sub>4</sub> *Mem1* regulatory element upstream of the *ppcA* gene, with a guanine in the first position of the A submodule and a CACT tetranucleotide in the B submodule (Gowik *et al.*, 2004; Akyildiz *et al.*, 2007). In contrast, *F. brownii* has the C<sub>4</sub> *ppcA* B submodule CACT sequence, but a C<sub>3</sub>-specific adenine in the first position of the A submodule, and consequently has an intermediate *Mem1* sequence like that of the C<sub>3</sub>–C<sub>4</sub> intermediate *F. pubescens* Rydberg (Akyildiz *et al.*, 2007). Interestingly, however, neither species shows complete compartmentation of PEPC and Rubisco in the mesophyll and bundle-sheath, respectively (Cheng *et al.*, 1988; Moore *et al.*, 1989).

From the above characteristics, a more C<sub>4</sub>-like photosynthetic physiology is predicted for *F. vaginata* than *F. brownii*, and the gas exchange data shown in Table 2 support this idea; the CO<sub>2</sub> compensation point of *F. vaginata* is the same

as that of the C<sub>4</sub> *F. bidentis*, and about half that of *F. brownii*. *Flaveria vaginata* CO<sub>2</sub> assimilation rates, carbon isotope ratios (δ<sup>13</sup>C), and oxygen inhibition of CO<sub>2</sub> assimilation values are also more C<sub>4</sub> like than those of *F. brownii*.

A seven-phase model describing the evolution of C<sub>4</sub> photosynthesis proposes that the earliest phase involved gene duplication events and other general modifications to a C<sub>3</sub> ancestor that predisposed it to subsequent steps toward C<sub>4</sub>-ness (Sage, 2004). Phases two and three involved changes to leaf anatomy, including reducing the distance between veins and development of a C<sub>4</sub>-like bundle sheath, that then allowed biochemical changes to occur in phases four and five. In the last two phases, the derived biochemistry was integrated and coordinated with the ancestral pathway, and then ultimately a full C<sub>4</sub> pathway was optimized (Sage, 2004). In light of this scheme, it appears that *F. vaginata* has ascended more steps of the C<sub>4</sub> pyramid than *F. brownii*, having acquired the C<sub>4</sub> regulatory components for



mesophyll-specific expression of PEPC and a C<sub>4</sub>-type CA3. Several other C<sub>3</sub>–C<sub>4</sub> and C<sub>4</sub>-like intermediates cluster in clade A of the *Flaveria* phylogeny with *F. vaginata* and the true C<sub>4</sub> *Flaveria* species (McKown *et al.*, 2005), and their inclusion in future comparative studies at the molecular level may give further insights into the pre-conditions that were necessary and the steps that were taken during the evolution of the C<sub>4</sub> photosynthetic pathway in *Flaveria*.

## Conclusions

The identification of sequences encoding β-CA orthologues in C<sub>3</sub> and C<sub>4</sub> *Flaveria* species, resolution of their expression patterns, and intracellular localization of the isoforms they encode have provided evidence for gene duplication and neofunctionalization events during the evolution of the C<sub>4</sub> pathway in the genus. From these results, the current working model for the evolution of β-CA in C<sub>4</sub> *Flaveria* species envisages a duplication of the gene encoding a chloroplastic CA in the ancestral C<sub>3</sub> *Flaveria* species, with one of the duplicates subsequently accumulating mutations in coding and non-coding regions. These modifications led to the loss of the sequence encoding the chloroplast transit peptide and gain of regulatory regions that direct high levels of mesophyll cell-specific expression, and resulted in the β-CA isoform that synthesizes bicarbonate in the first step in CO<sub>2</sub> assimilation in C<sub>4</sub> *Flaveria* species.

During the evolution of the C<sub>4</sub> syndrome in *Flaveria*, changes to C<sub>3</sub> leaf anatomy, which resulted in characteristic Kranz anatomy, were acquired stepwise, with particular traits preceding others, and these structural modifications evolved prior to C<sub>4</sub> biochemistry (McKown and Dengler, 2007). The studies described above suggest that the evolutionary route to C<sub>4</sub> biochemistry in *Flaveria* may have also depended on a specific stepwise acquisition of modifications. Further work on C<sub>4</sub> enzymes as well as metabolite transporters in *Flaveria* congeners using recent advances in cell type separation methods, cell and protein labelling techniques, and ‘-omics’ technologies is needed to elucidate fully the underlying molecular biology and biochemistry responsible for the photosynthetic physiologies of the *Flaveria* intermediates, and to resolve the molecular evolutionary path to full C<sub>4</sub> photosynthetic biochemistry in this genus. This information will generate a blueprint for what it took to evolve, and what it will probably take to construct, a C<sub>4</sub> plant from a C<sub>3</sub> ancestor.

## Acknowledgements

I thank Peter Westhoff for stimulating discussions and hosting me during my study leave.

## References

**Akyildiz M, Gowik U, Engelmann S, Koczor M, Streubel M, Westhoff P.** 2007. Evolution and function of a *cis*-regulatory module

for mesophyll-specific gene expression in the C<sub>4</sub> dicot. *Flaveria trinervia*. *The Plant Cell* **19**, 3391–3402.

**Alexandersson E, Saalbach G, Larsson C, Kjellbom P.** 2004. *Arabidopsis* plasma membrane proteomics identifies components of transport, signal transduction and membrane trafficking. *Plant and Cell Physiology* **45**, 1543–1556.

**Ali S, Taylor WC.** 2001. Quantitative regulation of the *Flaveria Me1* gene is controlled by the 3′-untranslated region and sequences near the amino terminus. *Plant Molecular Biology* **46**, 251–261.

**Benschop JJ, Mohammed S, O’Flaherty M, Heck AJR, Slijper M, Menke FLH.** 2007. Quantitative phosphoproteomics of early elicitor signaling in *Arabidopsis*. *Molecular and Cellular Proteomics* **6**, 1198–1214.

**Bracey MH, Christiansen J, Tovar P, Cramer SP, Bartlett SG.** 1994. Spinach carbonic anhydrase: investigation of the zinc-binding ligands by site-directed mutagenesis, elemental analysis, and EXAFS. *Biochemistry* **33**, 13126–13131.

**Burnell JN.** 2000. Carbonic anhydrases of higher plants: an overview. In: Chegwidden WR, Carter ND, Edwards YH, eds. *The carbonic anhydrases*. Basel, Switzerland: Birkhauser Verlag, 501–518.

**Burnell JN, Hatch MD.** 1988. Low bundle sheath carbonic anhydrase is apparently essential for effective C<sub>4</sub> pathway operation. *Plant Physiology* **86**, 1252–1256.

**Burnell JN, Gibbs MJ, Mason JG.** 1990. Spinach chloroplastic carbonic anhydrase: nucleotide sequence analysis of cDNA. *Plant Physiology* **92**, 37–40.

**Cavallaro A, Ludwig M, Burnell J.** 1994. The nucleotide sequence of a complementary DNA encoding *Flaveria bidentis* carbonic anhydrase. *FEBS Letters* **350**, 216–218.

**Chastain CJ, Chollet R.** 1989. Interspecific variation in assimilation of <sup>14</sup>CO<sub>2</sub> into C<sub>4</sub> acids by leaves of C<sub>3</sub>, C<sub>4</sub> and C<sub>3</sub>–C<sub>4</sub> intermediate *Flaveria* species near the CO<sub>2</sub> compensation concentration. *Planta* **179**, 81–88.

**Cheng S-H, Moore BD, Edwards GE, Ku MSB.** 1988. Photosynthesis in *Flaveria brownii*, a C<sub>4</sub>-like species. Leaf anatomy, characteristics of CO<sub>2</sub> exchange, compartmentation of photosynthetic enzymes, and metabolism of <sup>14</sup>CO<sub>2</sub>. *Plant Physiology* **87**, 867–873.

**Christin PA, Besnard G, Samaritani E, Duvall MR, Hodkinson TR, Savolainen V, Salamin N.** 2008. Oligocene CO<sub>2</sub> decline promoted C<sub>4</sub> photosynthesis in grasses. *Current Opinion in Biology* **18**, 37–43.

**Coleman JR.** 2000. Carbonic anhydrase and its role in photosynthesis. In: Leegood RC, Sharkey TD, von Caemmerer S, eds. *Photosynthesis: physiology and metabolism Advances in photosynthesis*, Vol. 9. Dordrecht, The Netherlands: Kluwer Academic Publishers, 353–367.

**Cowan IR.** 1986. Economics of carbon fixation in higher plants. In: Givnish TJ, ed. *On the economy of plant form and function*. Cambridge: Cambridge University Press, 133–170.

**Drincovich MF, Casati P, Andreo CS, Chessin SJ, Franceschi VR, Edwards GE, Ku MSB.** 1998. Evolution of C<sub>4</sub> photosynthesis in *Flaveria* species. Isoforms of NADP-malic enzyme. *Plant Physiology* **117**, 733–744.



- Edwards EJ, Osborne CP, Strömberg CAE, Smith SA, C<sub>4</sub> Grasses Consortium.** 2010. The origins of C<sub>4</sub> grasslands: integrating evolutionary and ecosystem science. *Science* **328**, 587–591.
- Edwards EJ, Smith SA.** 2010. Phylogenetic analyses reveal the shady history of C<sub>4</sub> grasses. *Proceedings of the National Academy of Sciences, USA* **107**, 2532–2537.
- Edwards GE, Ku MSB.** 1987. Biochemistry of C<sub>3</sub>–C<sub>4</sub> intermediates. In: Hatch MD, Boardman NK, eds. *The biochemistry of plants. Photosynthesis*, Vol. 10. London: Academic Press, 275–325.
- Engelmann S, Zogel C, Koczor M, Schlue U, Streubel M, Westhoff P.** 2008. Evolution of the C<sub>4</sub> phosphoenolpyruvate carboxylase promoter of the C<sub>4</sub> species *Flaveria trinervia*: the role of the proximal promoter region. *BMC Plant Biology* **8**, 4.
- Fabre N, Reiter IM, Becuwe-Linka N, Genty B, Rumeau D.** 2007. Characterization and expression analysis of genes encoding  $\alpha$  and  $\beta$  carbonic anhydrases in *Arabidopsis*. *Plant, Cell and Environment* **30**, 617–629.
- Ferreira FJ, Guo C, Coleman JR.** 2008. Reduction of plastid-localized carbonic anhydrase activity results in reduced *Arabidopsis* seedling survivorship. *Plant Physiology* **147**, 585–594.
- Fett JP, Coleman JR.** 1994. Characterization and expression of two cDNAs encoding carbonic anhydrase in *Arabidopsis thaliana*. *Plant Physiology* **105**, 707–713.
- Gowik U, Burscheidt J, Akyildiz M, Schlue U, Koczor M, Streubel M, Westhoff P.** 2004. *cis*-Regulatory elements for mesophyll-specific gene expression in the C<sub>4</sub> plant *Flaveria trinervia*, the promoter of the C<sub>4</sub> phosphoenolpyruvate carboxylase gene. *The Plant Cell* **16**, 1077–1090.
- Gutierrez M, Huber SC, Ku SB, Kanai R, Edwards GE.** 1974. Intracellular localization of carbon metabolism in mesophyll cells of C<sub>4</sub> plants. In: Avron M, ed. *Proceedings of the Third International Congress on Photosynthesis*. Amsterdam, The Netherlands: Elsevier Science Publishers, 1219–1230.
- Hatch MD, Burnell JN.** 1990. Carbonic anhydrase activity in leaves and its role in the first step of C<sub>4</sub> photosynthesis. *Plant Physiology* **93**, 825–828.
- Hermans J, Westhoff P.** 1990. Analysis of expression and evolutionary relationships of phosphoenolpyruvate carboxylase genes in *Flaveria trinervia* (C<sub>4</sub>) and *F. pringlei* (C<sub>3</sub>). *Molecular and General Genetics* **224**, 459–468.
- Hewett-Emmett D, Tashian RE.** 1996. Functional diversity, conservation, and convergence in the evolution of the  $\alpha$ -,  $\beta$ -, and  $\gamma$ -carbonic anhydrase gene families. *Molecular Phylogenetics and Evolution* **5**, 50–77.
- Hoang CV, Chapman KD.** 2002. Biochemical and molecular inhibition of plastidial carbonic anhydrase reduces the incorporation of acetate into lipids in cotton embryos and tobacco cell suspensions and leaves. *Plant Physiology* **128**, 1417–1427.
- Hu H, Boisson-Dernier A, Israelsson-Nordström M, Böhmer M, Xue S, Ries A, Godoski J, Kuhn JM, Schroeder JI.** 2010. Carbonic anhydrases are upstream regulators of CO<sub>2</sub>-controlled stomatal movements in guard cells. *Nature Cell Biology* **12**, 87–93.
- Ivanov BN, Ignatova LK, Romanova AK.** 2007. Diversity in forms and functions of carbonic anhydrase in terrestrial higher plants. *Russian Journal of Plant Physiology* **54**, 143–162.
- Jacobson BS, Fong F, Heath RL.** 1975. Carbonic anhydrase of spinach. Studies on its location, inhibition, and physiological function. *Plant Physiology* **55**, 468–474.
- Kachru RB, Anderson LE.** 1974. Chloroplast and cytoplasmic enzymes. V. Pea-leaf carbonic anhydrases. *Planta* **118**, 235–240.
- Kawamura Y, Uemura M.** 2003. Mass spectrometric approach for identifying putative plasma membrane proteins of *Arabidopsis* leaves associated with cold acclimation. *The Plant Journal* **36**, 141–154.
- Kimber MS, Pai EF.** 2000. The active site architecture of *Pisum sativum*  $\beta$ -carbonic anhydrase is a mirror image of that of  $\alpha$ -carbonic anhydrases. *EMBO Journal* **19**, 1407–1418.
- Ku SB, Edwards GE.** 1975. Photosynthesis in mesophyll protoplasts and bundle sheath cells of various types of C<sub>4</sub> plants. V. Enzymes of respiratory metabolism and energy utilizing enzymes of photosynthetic pathways. *Zeitschrift für Pflanzenphysiologie* **77**, 16–32.
- Ku MSB, Wu J, Dai Z, Scott RA, Chu C, Edwards GE.** 1991. Photosynthetic and photorespiratory characteristics of *Flaveria* species. *Plant Physiology* **96**, 518–528.
- Lai LB, Wang L, Nelson TM.** 2002. Distinct but conserved functions for two chloroplastic NADP-malic enzyme isoforms in C<sub>3</sub> and C<sub>4</sub> *Flaveria* species. *Plant Physiology* **128**, 125–139.
- Lipka B, Steinmüller K, Rosche E, Börsch D, Westhoff P.** 1994. The C<sub>3</sub> plant *Flaveria pringlei* contains a plastidic NADP-malic enzyme which is orthologous to the C<sub>4</sub> isoform of the C<sub>4</sub> plant. *F. trinervia*. *Plant Molecular Biology* **26**, 1775–1783.
- Ludwig M, Burnell JN.** 1995. Molecular comparison of carbonic anhydrase from *Flaveria* species demonstrating different photosynthetic pathways. *Plant Molecular Biology* **29**, 353–365.
- Majeau N, Arnoldo M, Coleman JR.** 1994. Modification of carbonic anhydrase activity by antisense and over-expression constructs in transgenic tobacco. *Plant Molecular Biology* **25**, 377–385.
- Marshall JS, Stubbs J, Chitty JA, Surin B, Taylor WC.** 1997. Expression of the C<sub>4</sub> *Me1* gene from *Flaveria bidentis* requires an interaction between 5' and 3' sequences. *The Plant Cell* **9**, 1515–1525.
- Marshall JS, Stubbs JD, Taylor WC.** 1996. Two genes encode highly similar chloroplastic NADP-malic enzymes in *Flaveria*. Implications for the evolution of C<sub>4</sub> photosynthesis. *Plant Physiology* **111**, 1251–1261.
- Martin V, Villarreal F, Miras I, Navaza A, Haouz A, González-Lebrero RM, Kaufman SB, Zabaleta E.** 2009. Recombinant plant gamma carbonic anhydrase homotrimers bind inorganic carbon. *FEBS Letters* **583**, 3425–3430.
- McGonigle B, Nelson T.** 1995. C<sub>4</sub> isoform of NADP-malate dehydrogenase. cDNA cloning and expression in leaves of C<sub>4</sub>, C<sub>3</sub>, and C<sub>3</sub>–C<sub>4</sub> intermediate species of *Flaveria*. *Plant Physiology* **108**, 1119–1126.
- McKown AD, Dengler NG.** 2007. Key innovations in the evolution of Kranz anatomy and C<sub>4</sub> vein pattern in *Flaveria* (Asteraceae). *American Journal of Botany* **94**, 382–399.

- McKown AD, Moncalvo J-M, Dengler NG.** 2005. Phylogeny of *Flaveria* (Asteraceae) and inference of  $C_4$  photosynthesis evolution. *American Journal of Botany* **92**, 1911–1928.
- Mitra SK, Gantt JA, Ruby JF, Clouse SD, Goshe MB.** 2007. Membrane proteomic analysis of *Arabidopsis thaliana* using alternative solubilization techniques. *Journal of Proteome Research* **6**, 1933–1950.
- Mongrand S, Morel J, Laroche J, Claverol S, Carde J-P, Hartmann M-A, Bonneau M, Simon-Plas F, Lessire R, Bessoule J-J.** 2004. Lipid rafts in higher plant cells. Purification and characterization of Triton X-100-insoluble microdomains from tobacco plasma membrane. *Journal of Biological Chemistry* **279**, 36277–36286.
- Monson RK, Moore BD, Ku MSB, Edwards GE.** 1986. Co-function of  $C_3$ - and  $C_4$ -photosynthetic pathways in  $C_3$ ,  $C_4$  and  $C_3$ - $C_4$  intermediate *Flaveria* species. *Planta* **168**, 493–502.
- Moore BD, Ku MSB, Edwards GE.** 1987.  $C_4$  photosynthesis and light-dependent accumulation of inorganic carbon in leaves of  $C_3$ - $C_4$  and  $C_4$  *Flaveria* species. *Australian Journal of Plant Physiology* **14**, 657–668.
- Moore BD, Ku MSB, Edwards GE.** 1989. Expression of  $C_4$ -like photosynthesis in several species of *Flaveria*. *Plant, Cell and Environment* **12**, 541–549.
- Moroney JV, Bartlett SG, Samuelsson G.** 2001. Carbonic anhydrases in plants and algae. *Plant, Cell and Environment* **24**, 141–153.
- Osborne CP, Beerling DJ.** 2006. Nature's green revolution: the remarkable evolutionary rise of  $C_4$  plants. *Philosophical Transactions of the Royal Society B: Biological Sciences* **361**, 173–194.
- Osborne CP, Freckleton RP.** 2009. Ecological selection pressures for  $C_4$  photosynthesis in the grasses. *Proceedings of the Royal Society B: Biological Sciences* **276**, 1753–1760.
- Parisi G, Perales M, Fornasari MS, et al.** 2004. Gamma carbonic anhydrases in plant mitochondria. *Plant Molecular Biology* **55**, 193–207.
- Perales M, Eubel H, Heinemeyer J, Colaneri A, Zabaleta E, Braun H-P.** 2005. Disruption of a nuclear gene encoding a mitochondrial gamma carbonic anhydrase reduces complex I and supercomplex I + II<sub>2</sub> levels and alters mitochondrial physiology in *Arabidopsis*. *Journal of Molecular Biology* **350**, 263–277.
- Poincelot RP.** 1972. Intracellular distribution of carbonic anhydrase in spinach leaves. *Biochimica et Biophysica Acta* **258**, 637–642.
- Powell AM.** 1978. Systematics of *Flaveria* (Flaveriinae–Asteraceae). *Annals of the Missouri Botanical Garden* **65**, 590–636.
- Price GD, von Caemmerer S, Evans JR, Yu J-W, Lloyd J, Oja V, Kell P, Harrison K, Gallagher A, Badger MR.** 1994. Specific reduction of chloroplast carbonic anhydrase activity by antisense RNA in transgenic tobacco plants has a minor effect on photosynthetic  $CO_2$  assimilation. *Planta* **193**, 331–340.
- Provart NJ, Majeau N, Coleman JR.** 1993. Characterization of pea chloroplastic carbonic anhydrase. Expression in *Escherichia coli* and site-directed mutagenesis. *Plant Molecular Biology* **22**, 937–943.
- Rajeevan MS, Bassett CL, Hughes DW.** 1991. Isolation and characterization of cDNA clones for NADP-malic enzyme from leaves of *Flaveria*: transcript abundance distinguishes  $C_3$ ,  $C_3$ - $C_4$  and  $C_4$  photosynthetic types. *Plant Molecular Biology* **17**, 371–383.
- Raven JA, Newman JR.** 1994. Requirement for carbonic anhydrase activity in processes other than photosynthetic inorganic carbon assimilation. *Plant, Cell and Environment* **17**, 123–130.
- Reed ML.** 1979. Intracellular location of carbonate dehydratase (carbonic anhydrase) in leaf tissue. *Plant Physiology* **63**, 216–217.
- Reed ML, Graham D.** 1981. Carbonic anhydrase in plants: distribution, properties and possible physiological roles. *Progress in Phytochemistry* **7**, 47–94.
- Restrepo S, Myers KL, del Pozo O, Martin GB, Hart AL, Buell CR, Fry WE, Smart CD.** 2005. Gene profiling of a compatible interaction between *Phytophthora infestans* and *Solanum tuberosum* suggests a role for carbonic anhydrase. *Molecular Plant-Microbe Interactions* **18**, 913–922.
- Roeske CA, Ogren WL.** 1990. Nucleotide sequence of pea cDNA encoding chloroplast carbonic anhydrase. *Nucleic Acids Research* **18**, 3413.
- Rosche E, Chitty J, Westhoff P, Taylor WC.** 1998. Analysis of promoter activity for the gene encoding pyruvate orthophosphate dikinase in stably transformed  $C_4$  *Flaveria* species. *Plant Physiology* **117**, 821–829.
- Rosche E, Streubel M, Westhoff P.** 1994. Primary structure of the pyruvate orthophosphate dikinase of the  $C_3$  plant *Flaveria pringlei* and expression analysis of pyruvate orthophosphate dikinase sequences in  $C_3$ ,  $C_3$ - $C_4$  and  $C_4$  *Flaveria* species. *Plant Molecular Biology* **26**, 763–769.
- Rumeau D, Cuiné S, Fina L, Gault N, Nicole M, Peltier G.** 1996. Subcellular distribution of carbonic anhydrase in *Solanum tuberosum* L. leaves. Characterization of two compartment-specific isoforms. *Planta* **199**, 79–88.
- Sage RF.** 2004. The evolution of  $C_4$  photosynthesis. *New Phytologist* **161**, 341–370.
- Santoni V, Rouquié D, Dumas P, et al.** 1998. Use of a proteome strategy for tagging proteins present at the plasma membrane. *The Plant Journal* **16**, 633–641.
- Slaymaker DH, Navarre DA, Clark D, del Pozo O, Martin GB, Klessig DF.** 2002. The tobacco salicylic acid-binding protein 3 (SABP3) is the chloroplast carbonic anhydrase, which exhibits antioxidant activity and plays a role in the hypersensitive defense response. *Proceedings of the National Academy of Sciences, USA* **99**, 11640–11645.
- Small I, Peeters N, Legeai F, Lurin C.** 2004. Predotar: a tool for rapidly screening proteomes for N-terminal targeting sequences. *Proteomics* **4**, 1581–1590.
- Smith BN, Powell AM.** 1984.  $C_4$ -like  $F_1$ -hybrid of  $C_3 \times C_4$  *Flaveria* species. *Naturwissenschaften* **71**, 217–218.
- Tang W, Deng Z, Osés-Prieto JA, Suzuki N, Zhu S, Zhang X, Burlingame AL, Wang Z-Y.** 2008. Proteomics studies of brassinosteroid signal transduction using prefractionation and two-dimensional DIGE. *Molecular and Cellular Proteomics* **7**, 728–738.
- Tanz SK, Tetu SG, Vella NGF, Ludwig M.** 2009. Loss of the transit peptide and an increase in gene expression of an ancestral chloroplastic carbonic anhydrase were instrumental in the evolution of

- the cytosolic C<sub>4</sub> carbonic anhydrase in *Flaveria*. *Plant Physiology* **150**, 1515–1529.
- Tetu SG, Tanz SK, Vella N, Burnell JB, Ludwig M.** 2007. The *Flaveria bidentis*  $\beta$ -carbonic anhydrase gene family encodes cytosolic and chloroplastic isoforms demonstrating distinct organ-specific expression patterns. *Plant Physiology* **144**, 1316–1327.
- Tipple BJ, Pagani M.** 2007. The early origins of terrestrial C<sub>4</sub> photosynthesis. *Annual Review of Earth and Planetary Sciences* **35**, 435–461.
- Tsuzuki M, Miyachi S, Edwards GE.** 1985. Localization of carbonic anhydrase in mesophyll cells of terrestrial C<sub>3</sub> plants in relation to CO<sub>2</sub> assimilation. *Plant and Cell Physiology* **26**, 881–891.
- Uehlein N, Lovisolo C, Siefritz F, Kaldenhoff R.** 2003. The tobacco aquaporin NtAQP1 is a membrane CO<sub>2</sub> pore with physiological functions. *Nature* **425**, 734–737.
- Utsunomiya E, Muto S.** 1993. Carbonic anhydrase in the plasma membranes from leaves of C<sub>3</sub> and C<sub>4</sub> plants. *Physiologia Plantarum* **88**, 413–419.
- Vicentini A, Barber JC, Aliscioni SS, Giussani LM, Kellogg EA.** 2008. The age of the grasses and clusters of origins of C<sub>4</sub> photosynthesis. *Global Change Biology* **14**, 2963–2977.
- Villarejo A, Burén S, Larsson S, et al.** 2005. Evidence for a protein transported through the secretory pathway *en route* to the higher plant chloroplast. *Nature Cell Biology* **7**, 1224–1213.
- von Caemmerer S, Quinn V, Hancock NC, Price GD, Furbank RT, Ludwig M.** 2004. Carbonic anhydrase and C<sub>4</sub> photosynthesis: a transgenic analysis. *Plant, Cell and Environment* **27**, 697–703.
- von Heijne G, Steppuhn J, Hermann RG.** 1989. Domain structure of mitochondrial and chloroplast targeting peptides. *European Journal of Biochemistry* **180**, 535–545.
- Wang Y-Q, Feechan A, Yun B-W, et al.** 2009. S-Nitrosylation of AtSABP3 antagonizes the expression of plant immunity. *Journal of Biological Chemistry* **284**, 2131–2137.
- Williams TG, Flanagan LB, Coleman JR.** 1996. Photosynthetic gas exchange and discrimination against <sup>13</sup>CO<sub>2</sub> and C<sup>18</sup>O<sup>16</sup>O in tobacco plants modified by an antisense construct to have low chloroplastic carbonic anhydrase. *Plant Physiology* **112**, 319–326.
